# Supplementary material for: A Prospective Study of Genetic Variants in Infants with Congenital Unilateral Sensorineural Hearing Loss
Source: MDPI journal article supplement (doi:10.3390/jcm12020495), 2023-01-07
Supplement: s1 [file s1]

**Table S1, Supplementary Materials.** Genetic testing panels and arrays.

|                                                                                                                                                                                                                                                                                                                                                                                                                                                                                                                                                                                                                                                                                                                                                                                                                                                                                                                                                                                                                                                                                                                                                                                                                                                                                                                                                                                                                                                                                                                                                                                                                                                                                                                                                                                                                                                                                                                                                                                                                                                                                                                                                                                                                                                                                                                                                                                                                                                                                                                                                                                                                                                                                                                                                                                                                                                                                                                                                                                                                                                                                                                                                                                                                                                                                                                                                                                                                                                                                                                                                                                                                                                                                                                                                                                                                                                                                                                                                                                                                                                                                                                                                                                                                                                                                                                                                                                                                                                                                                                                                                                                                                                                                                                                                                                                                                                                                                                                                                                                                                                                                                                                                                                                                                                                                                                                                                                                                                                                                                                                                                                                                                                                                                                                                                                                                                                                                                                                                                                                                                                                                                                                                                                                                                                                                                                                                                                                                                                                                                                                                                                                                                                                                                                                                                                                                                                                                                                                                                                                                                                                                                                                                                                                                                                                                                                                                                                                                                                                                                                                                                                                                                                                                                                                                                                                                                                                                                                                                                                                                                                                                                                                                                                                                                                                                                                                                                                                                                                                                                                                                                                                                                                                                                                                                                                                                                                                                                                                                                                                                                                                                                                                                                                                                                                                                                                                                                                                                                                                                                                                                                                                                                                                                                                                                                                                                                                                                                                                                                                                                                                                                                                                                                                                                                                                                                                                                                                                                                                                                                                                                                                                                                                                                                                                                                                                                                                                                                                                                                                                                                                                                                                                                                                                                                                                                                                                                                                                                                                                                                                                                                                                                                                                                                                                                                                                                                                                                                                                                                                                                                                                                                                                                                                                                                                                                                                                                                                                                                                                                                                                                                                                                                                                                                                                                                                                                                                                                                                                                                                                                                                                                                                                                                                                                                                                                                                                                                                                                                                                                                                                                                                                                                                                                                                                                                                                                                                                                                                                                                                                                                                                                                                                                                                                                                                                                                                                                                                                                                                                                                                                                                                                                                                                                                                                                                                                                                                                                                                                                                                                                                                                                                                                                                                                                                                                                                                                                                                                                                                                                                                                                                                                                                                                                                                                                                                                                                                                                                                                                                                                                                                                                                                                                                                                                                                                                                                                                                                                                               |
|-------------------------------------------------------------------------------------------------------------------------------------------------------------------------------------------------------------------------------------------------------------------------------------------------------------------------------------------------------------------------------------------------------------------------------------------------------------------------------------------------------------------------------------------------------------------------------------------------------------------------------------------------------------------------------------------------------------------------------------------------------------------------------------------------------------------------------------------------------------------------------------------------------------------------------------------------------------------------------------------------------------------------------------------------------------------------------------------------------------------------------------------------------------------------------------------------------------------------------------------------------------------------------------------------------------------------------------------------------------------------------------------------------------------------------------------------------------------------------------------------------------------------------------------------------------------------------------------------------------------------------------------------------------------------------------------------------------------------------------------------------------------------------------------------------------------------------------------------------------------------------------------------------------------------------------------------------------------------------------------------------------------------------------------------------------------------------------------------------------------------------------------------------------------------------------------------------------------------------------------------------------------------------------------------------------------------------------------------------------------------------------------------------------------------------------------------------------------------------------------------------------------------------------------------------------------------------------------------------------------------------------------------------------------------------------------------------------------------------------------------------------------------------------------------------------------------------------------------------------------------------------------------------------------------------------------------------------------------------------------------------------------------------------------------------------------------------------------------------------------------------------------------------------------------------------------------------------------------------------------------------------------------------------------------------------------------------------------------------------------------------------------------------------------------------------------------------------------------------------------------------------------------------------------------------------------------------------------------------------------------------------------------------------------------------------------------------------------------------------------------------------------------------------------------------------------------------------------------------------------------------------------------------------------------------------------------------------------------------------------------------------------------------------------------------------------------------------------------------------------------------------------------------------------------------------------------------------------------------------------------------------------------------------------------------------------------------------------------------------------------------------------------------------------------------------------------------------------------------------------------------------------------------------------------------------------------------------------------------------------------------------------------------------------------------------------------------------------------------------------------------------------------------------------------------------------------------------------------------------------------------------------------------------------------------------------------------------------------------------------------------------------------------------------------------------------------------------------------------------------------------------------------------------------------------------------------------------------------------------------------------------------------------------------------------------------------------------------------------------------------------------------------------------------------------------------------------------------------------------------------------------------------------------------------------------------------------------------------------------------------------------------------------------------------------------------------------------------------------------------------------------------------------------------------------------------------------------------------------------------------------------------------------------------------------------------------------------------------------------------------------------------------------------------------------------------------------------------------------------------------------------------------------------------------------------------------------------------------------------------------------------------------------------------------------------------------------------------------------------------------------------------------------------------------------------------------------------------------------------------------------------------------------------------------------------------------------------------------------------------------------------------------------------------------------------------------------------------------------------------------------------------------------------------------------------------------------------------------------------------------------------------------------------------------------------------------------------------------------------------------------------------------------------------------------------------------------------------------------------------------------------------------------------------------------------------------------------------------------------------------------------------------------------------------------------------------------------------------------------------------------------------------------------------------------------------------------------------------------------------------------------------------------------------------------------------------------------------------------------------------------------------------------------------------------------------------------------------------------------------------------------------------------------------------------------------------------------------------------------------------------------------------------------------------------------------------------------------------------------------------------------------------------------------------------------------------------------------------------------------------------------------------------------------------------------------------------------------------------------------------------------------------------------------------------------------------------------------------------------------------------------------------------------------------------------------------------------------------------------------------------------------------------------------------------------------------------------------------------------------------------------------------------------------------------------------------------------------------------------------------------------------------------------------------------------------------------------------------------------------------------------------------------------------------------------------------------------------------------------------------------------------------------------------------------------------------------------------------------------------------------------------------------------------------------------------------------------------------------------------------------------------------------------------------------------------------------------------------------------------------------------------------------------------------------------------------------------------------------------------------------------------------------------------------------------------------------------------------------------------------------------------------------------------------------------------------------------------------------------------------------------------------------------------------------------------------------------------------------------------------------------------------------------------------------------------------------------------------------------------------------------------------------------------------------------------------------------------------------------------------------------------------------------------------------------------------------------------------------------------------------------------------------------------------------------------------------------------------------------------------------------------------------------------------------------------------------------------------------------------------------------------------------------------------------------------------------------------------------------------------------------------------------------------------------------------------------------------------------------------------------------------------------------------------------------------------------------------------------------------------------------------------------------------------------------------------------------------------------------------------------------------------------------------------------------------------------------------------------------------------------------------------------------------------------------------------------------------------------------------------------------------------------------------------------------------------------------------------------------------------------------------------------------------------------------------------------------------------------------------------------------------------------------------------------------------------------------------------------------------------------------------------------------------------------------------------------------------------------------------------------------------------------------------------------------------------------------------------------------------------------------------------------------------------------------------------------------------------------------------------------------------------------------------------------------------------------------------------------------------------------------------------------------------------------------------------------------------------------------------------------------------------------------------------------------------------------------------------------------------------------------------------------------------------------------------------------------------------------------------------------------------------------------------------------------------------------------------------------------------------------------------------------------------------------------------------------------------------------------------------------------------------------------------------------------------------------------------------------------------------------------------------------------------------------------------------------------------------------------------------------------------------------------------------------------------------------------------------------------------------------------------------------------------------------------------------------------------------------------------------------------------------------------------------------------------------------------------------------------------------------------------------------------------------------------------------------------------------------------------------------------------------------------------------------------------------------------------------------------------------------------------------------------------------------------------------------------------------------------------------------------------------------------------------------------------------------------------------------------------------------------------------------------------------------------------------------------------------------------------------------------------------------------------------------------------------------------------------------------------------------------------------------------------------------------------------------------------------------------------------------------------------------------------------------------------------------------------------------------------------------------------------------------------------------------------------------------------------------------------------------------------------------------------------------------------------------------------------------------------------------------------------------------------------------------------------------------------------------------------------------------------------------------------------------------------------------------------------------------------------------------------------------------------------------------------------------------------------------------------------------------------------------------------------------------------------------------------------------------------------------------------------------------------------------------------------------------------------------------------------------------------------------------------------------------------------------------------------------------------------------------------------------------------------------------------------------------------------------------------------------------------------------------------------------------------------------------------------------------------------------------------------------------------------------------------------------------------------------------------------------------------------------------------------------------------------------------------------------------------------------------------------------------------------------------------------------------------------------------------------------------------------------------------------------------------------------------------------------------------------------------------------------------------------------------------------------------------------------------------------------------------------------------------------------------------------------------------------------------------------------------------------------------------------------|
| Fifteen subjects were tested with OtoSCOPE® v.9 that uses targeted genomic enrichment and massively parallel sequencing of 224 hearing loss-associated genes (University of Iowa). Analyzed genes with the genetic variant found in bold, pathogen according to [1, 2]:                                                                                                                                                                                                                                                                                                                                                                                                                                                                                                                                                                                                                                                                                                                                                                                                                                                                                                                                                                                                                                                                                                                                                                                                                                                                                                                                                                                                                                                                                                                                                                                                                                                                                                                                                                                                                                                                                                                                                                                                                                                                                                                                                                                                                                                                                                                                                                                                                                                                                                                                                                                                                                                                                                                                                                                                                                                                                                                                                                                                                                                                                                                                                                                                                                                                                                                                                                                                                                                                                                                                                                                                                                                                                                                                                                                                                                                                                                                                                                                                                                                                                                                                                                                                                                                                                                                                                                                                                                                                                                                                                                                                                                                                                                                                                                                                                                                                                                                                                                                                                                                                                                                                                                                                                                                                                                                                                                                                                                                                                                                                                                                                                                                                                                                                                                                                                                                                                                                                                                                                                                                                                                                                                                                                                                                                                                                                                                                                                                                                                                                                                                                                                                                                                                                                                                                                                                                                                                                                                                                                                                                                                                                                                                                                                                                                                                                                                                                                                                                                                                                                                                                                                                                                                                                                                                                                                                                                                                                                                                                                                                                                                                                                                                                                                                                                                                                                                                                                                                                                                                                                                                                                                                                                                                                                                                                                                                                                                                                                                                                                                                                                                                                                                                                                                                                                                                                                                                                                                                                                                                                                                                                                                                                                                                                                                                                                                                                                                                                                                                                                                                                                                                                                                                                                                                                                                                                                                                                                                                                                                                                                                                                                                                                                                                                                                                                                                                                                                                                                                                                                                                                                                                                                                                                                                                                                                                                                                                                                                                                                                                                                                                                                                                                                                                                                                                                                                                                                                                                                                                                                                                                                                                                                                                                                                                                                                                                                                                                                                                                                                                                                                                                                                                                                                                                                                                                                                                                                                                                                                                                                                                                                                                                                                                                                                                                                                                                                                                                                                                                                                                                                                                                                                                                                                                                                                                                                                                                                                                                                                                                                                                                                                                                                                                                                                                                                                                                                                                                                                                                                                                                                                                                                                                                                                                                                                                                                                                                                                                                                                                                                                                                                                                                                                                                                                                                                                                                                                                                                                                                                                                                                                                                                                                                                                                                                                                                                                                                                                                                                                                                                                                                                                                                                                       |
| ABHD12, ACTB, ACTG1, ADCY1, ADGRV1, AIFM1, ALMS1, AMMECR1, ANKH, ATP2B2, ATP6V0A4, ATP6V1B1, ATP6V1B2, BCS1L, BDP1, BSND, BTBD, CABP2, CACNA1D, CCDC50, CD164, CDC14A, CDH23, CEACAM16, CEP78, <b>CHD7</b> , CHSY1, CIB2, CISD2, CLDN14, CLDN9, CLIC5, CLPP, CLRN1, COCH, COL11A1, COL11A2, COL2A1, COL4A3, COL4A4, COL4A5, COL4A6, COL9A1, COL9A2, COL9A3, CRYM, DCAF17, DCDC2, DIABLO, DIAPH1, DIAPH3, DLX5, DMXL2, DNMT1, DSPP, EDN3, EDNRB, ELMOD3, EPS8, EPS8L2, ERL1, ESPN, ESRRB, EYA1, EYA4, FDXR, FGF3, FGFR1, FGFR2, FGFR3, FITM2, FOXI1, GAB1, GATA3, GIPC3, <b>GJB2</b> , GJB3, GJB6 1, GPRASP2, GSPM2, GRAP, GREB1L, GRHL2, GRXCR1, GRXCR2, GSDME, HARS2, HGF, HOMER2, HOXA2, HOXB1, HSD17B4, IFNL1, ILDR1, KARS1, KCNE1, KCNJ10, KCNQ1, KCNQ4, KITLG, KMT2D, LARS2, LHFPL5, LHX3, LMX1A, LOXHD1, LOXL3, LRP2, LRTOMT, MAN2B1, MANBA, MARVELD2, MASP1, MCM2, MET, MGP, MIR96, MITF, MPZL2, MSRB3, MT-CO1, MT-ND1, MT-RNR1, MT-TH, MT-TL, MT-TK, MT-TL1, MT-TS1, MT-TS2, MYH14, MYH9, MYO15A, MYO3A, MYO6, MYO7A, NARS2, NDP, NEFL, NF2, NLRP3, NOG, NR2F1, OPA1, OSBPL2, OTOA, OTOF, OTOG, OTOGL, P2RX2, PAX1, PAX3, PCDH15, PDE1C, PDZD7, PEX1, PEX26, PEX6, PJKV, PLS1, PNPT1, POLR1B, POLR1C, POLR1D, POU3F4, POU4F3, PIP5K2, PRPS1, PTPRQ, RAI1, RDX, REST, RIPOR2, ROR1, S1PR2, SEMA3E, SERPINB6, SIX1, SIX2, SIX5, SLC17A8, SLC19A2, SLC22A4, SLC26A4, SLC26A5, SLC33A1, SLC44A4, SLC4A11, SLC52A2, SLC52A3, SLITRK6, SMPX, SNAI2, SOX10, SPATA5, SPNS2, STRC, SUCLA2, SYNE4, TBC1D24, TBL1X, TBX1, TCOF1, TECTA, TFAP2A, TIMM8A, TJP2, TMC1, TMEM126A, TMEM132E, TMIE, TMPRSS3, TNC, TPRN, TRIOBP, TRRAP, TSPEAR, TUBB4B, TWNK, USH1C, USH1G, USH2A, WBP2, WFS1, WHRN.                                                                                                                                                                                                                                                                                                                                                                                                                                                                                                                                                                                                                                                                                                                                                                                                                                                                                                                                                                                                                                                                                                                                                                                                                                                                                                                                                                                                                                                                                                                                                                                                                                                                                                                                                                                                                                                                                                                                                                                                                                                                                                                                                                                                                                                                                                                                                                                                                                                                                                                                                                                                                                                                                                                                                                                                                                                                                                                                                                                                                                                                                                                                                                                                                                                                                                                                                                                                                                                                                                                                                                                                                                                                                                                                                                                                                                                                                                                                                                                                                                                                                                                                                                                                                                                                                                                                                                                                                                                                                                                                                                                                                                                                                                                                                                                                                                                                                                                                                                                                                                                                                                                                                                                                                                                                                                                                                                                                                                                                                                                                                                                                                                                                                                                                                                                                                                                                                                                                                                                                                                                                                                                                                                                                                                                                                                                                                                                                                                                                                                                                                                                                                                                                                                                                                                                                                                                                                                                                                                                                                                                                                                                                                                                                                                                                                                                                                                                                                                                                                                                                                                                                                                                                                                                                                                                                                                                                                                                                                                                                                                                                                                                                                                                                                                                                                                                                                                                                                                                                                                                                                                                                                                                                                                                                                                                                                                                                                                                                                                                                                                                                                                                                                                                                                                                                                                                                                                                                                                                                                                                                                                                                                                                                                                                                                                                                                                                                                                                                                                                                                                                                                                                                                                                                                                                                                                                                                                                                                                                                                                                                                                                                                                                                                                                                                                                                                                                                                                                                                                                                                                                                                                                                                                                                                                                                                                                                                                                                                                                                                                                                                                                                                                                                                                                                                                                                                                                                                                                                                                                                                                                                                                                                                                                                                                                                                                                                                                                                                                                                                                                                                                                                                                                                                                                                                                                                                                                                                                                                                                                                                                                                                                                                                                                                                                                                                                                                                                                                                                                                                                                                                                                                                                                                                                                                                                                                                                                                                                                                                                                                                                                                                                                                                                                                                                                                                                                                                                                                                                                                                                                                                                                                                                                                                                                                    |
| S3 was tested with whole genome sanger sequencing with massive parallel sequencing (MPS) based on human phenotype ontology (HPO) terms preaxial polydactyly, anal atresia, and hearing loss (Karolinska University Laboratory). Analyzed genes with the genetic variant found in bold, pathogenic according to [2]:                                                                                                                                                                                                                                                                                                                                                                                                                                                                                                                                                                                                                                                                                                                                                                                                                                                                                                                                                                                                                                                                                                                                                                                                                                                                                                                                                                                                                                                                                                                                                                                                                                                                                                                                                                                                                                                                                                                                                                                                                                                                                                                                                                                                                                                                                                                                                                                                                                                                                                                                                                                                                                                                                                                                                                                                                                                                                                                                                                                                                                                                                                                                                                                                                                                                                                                                                                                                                                                                                                                                                                                                                                                                                                                                                                                                                                                                                                                                                                                                                                                                                                                                                                                                                                                                                                                                                                                                                                                                                                                                                                                                                                                                                                                                                                                                                                                                                                                                                                                                                                                                                                                                                                                                                                                                                                                                                                                                                                                                                                                                                                                                                                                                                                                                                                                                                                                                                                                                                                                                                                                                                                                                                                                                                                                                                                                                                                                                                                                                                                                                                                                                                                                                                                                                                                                                                                                                                                                                                                                                                                                                                                                                                                                                                                                                                                                                                                                                                                                                                                                                                                                                                                                                                                                                                                                                                                                                                                                                                                                                                                                                                                                                                                                                                                                                                                                                                                                                                                                                                                                                                                                                                                                                                                                                                                                                                                                                                                                                                                                                                                                                                                                                                                                                                                                                                                                                                                                                                                                                                                                                                                                                                                                                                                                                                                                                                                                                                                                                                                                                                                                                                                                                                                                                                                                                                                                                                                                                                                                                                                                                                                                                                                                                                                                                                                                                                                                                                                                                                                                                                                                                                                                                                                                                                                                                                                                                                                                                                                                                                                                                                                                                                                                                                                                                                                                                                                                                                                                                                                                                                                                                                                                                                                                                                                                                                                                                                                                                                                                                                                                                                                                                                                                                                                                                                                                                                                                                                                                                                                                                                                                                                                                                                                                                                                                                                                                                                                                                                                                                                                                                                                                                                                                                                                                                                                                                                                                                                                                                                                                                                                                                                                                                                                                                                                                                                                                                                                                                                                                                                                                                                                                                                                                                                                                                                                                                                                                                                                                                                                                                                                                                                                                                                                                                                                                                                                                                                                                                                                                                                                                                                                                                                                                                                                                                                                                                                                                                                                                                                                                                                                                                                                           |
| AMER1, ARVCF, B3GLCT, BCOR, BMP4, BRCA1, BRCA2, BRIP1, CDC45, CDH1, CEP290, CHD7, CHN1, COMT, COX7B, CPLANE1, CPLX1, CSPP1, CTBP1, CTNND1, DACT1, DCHS1, DYNC2H1, DYNC2I1, DYNC2I2, EFTUD2, ERCC4, EXTL3, FANCA, FANCB, FANCC, FANCD2, FANCE, FANCF, FANCG, FANCI, FANCL, FANCM, FGFR2, FGFR3, FGFRL1, FGFRL2, FGFRL3, FGFRL4, FGFRL5, FGFRL6, FGFRL7, FGFRL8, FGFRL9, FGFRL10, FGFRL11, FGFRL12, FGFRL13, FGFRL14, FGFRL15, FGFRL16, FGFRL17, FGFRL18, FGFRL19, FGFRL20, FGFRL21, FGFRL22, FGFRL23, FGFRL24, FGFRL25, FGFRL26, FGFRL27, FGFRL28, FGFRL29, FGFRL30, FGFRL31, FGFRL32, FGFRL33, FGFRL34, FGFRL35, FGFRL36, FGFRL37, FGFRL38, FGFRL39, FGFRL40, FGFRL41, FGFRL42, FGFRL43, FGFRL44, FGFRL45, FGFRL46, FGFRL47, FGFRL48, FGFRL49, FGFRL50, FGFRL51, FGFRL52, FGFRL53, FGFRL54, FGFRL55, FGFRL56, FGFRL57, FGFRL58, FGFRL59, FGFRL60, FGFRL61, FGFRL62, FGFRL63, FGFRL64, FGFRL65, FGFRL66, FGFRL67, FGFRL68, FGFRL69, FGFRL70, FGFRL71, FGFRL72, FGFRL73, FGFRL74, FGFRL75, FGFRL76, FGFRL77, FGFRL78, FGFRL79, FGFRL80, FGFRL81, FGFRL82, FGFRL83, FGFRL84, FGFRL85, FGFRL86, FGFRL87, FGFRL88, FGFRL89, FGFRL90, FGFRL91, FGFRL92, FGFRL93, FGFRL94, FGFRL95, FGFRL96, FGFRL97, FGFRL98, FGFRL99, FGFRL100, FGFRL101, FGFRL102, FGFRL103, FGFRL104, FGFRL105, FGFRL106, FGFRL107, FGFRL108, FGFRL109, FGFRL110, FGFRL111, FGFRL112, FGFRL113, FGFRL114, FGFRL115, FGFRL116, FGFRL117, FGFRL118, FGFRL119, FGFRL120, FGFRL121, FGFRL122, FGFRL123, FGFRL124, FGFRL125, FGFRL126, FGFRL127, FGFRL128, FGFRL129, FGFRL130, FGFRL131, FGFRL132, FGFRL133, FGFRL134, FGFRL135, FGFRL136, FGFRL137, FGFRL138, FGFRL139, FGFRL140, FGFRL141, FGFRL142, FGFRL143, FGFRL144, FGFRL145, FGFRL146, FGFRL147, FGFRL148, FGFRL149, FGFRL150, FGFRL151, FGFRL152, FGFRL153, FGFRL154, FGFRL155, FGFRL156, FGFRL157, FGFRL158, FGFRL159, FGFRL160, FGFRL161, FGFRL162, FGFRL163, FGFRL164, FGFRL165, FGFRL166, FGFRL167, FGFRL168, FGFRL169, FGFRL170, FGFRL171, FGFRL172, FGFRL173, FGFRL174, FGFRL175, FGFRL176, FGFRL177, FGFRL178, FGFRL179, FGFRL180, FGFRL181, FGFRL182, FGFRL183, FGFRL184, FGFRL185, FGFRL186, FGFRL187, FGFRL188, FGFRL189, FGFRL190, FGFRL191, FGFRL192, FGFRL193, FGFRL194, FGFRL195, FGFRL196, FGFRL197, FGFRL198, FGFRL199, FGFRL200, FGFRL201, FGFRL202, FGFRL203, FGFRL204, FGFRL205, FGFRL206, FGFRL207, FGFRL208, FGFRL209, FGFRL210, FGFRL211, FGFRL212, FGFRL213, FGFRL214, FGFRL215, FGFRL216, FGFRL217, FGFRL218, FGFRL219, FGFRL220, FGFRL221, FGFRL222, FGFRL223, FGFRL224, FGFRL225, FGFRL226, FGFRL227, FGFRL228, FGFRL229, FGFRL230, FGFRL231, FGFRL232, FGFRL233, FGFRL234, FGFRL235, FGFRL236, FGFRL237, FGFRL238, FGFRL239, FGFRL240, FGFRL241, FGFRL242, FGFRL243, FGFRL244, FGFRL245, FGFRL246, FGFRL247, FGFRL248, FGFRL249, FGFRL250, FGFRL251, FGFRL252, FGFRL253, FGFRL254, FGFRL255, FGFRL256, FGFRL257, FGFRL258, FGFRL259, FGFRL260, FGFRL261, FGFRL262, FGFRL263, FGFRL264, FGFRL265, FGFRL266, FGFRL267, FGFRL268, FGFRL269, FGFRL270, FGFRL271, FGFRL272, FGFRL273, FGFRL274, FGFRL275, FGFRL276, FGFRL277, FGFRL278, FGFRL279, FGFRL280, FGFRL281, FGFRL282, FGFRL283, FGFRL284, FGFRL285, FGFRL286, FGFRL287, FGFRL288, FGFRL289, FGFRL290, FGFRL291, FGFRL292, FGFRL293, FGFRL294, FGFRL295, FGFRL296, FGFRL297, FGFRL298, FGFRL299, FGFRL300, FGFRL301, FGFRL302, FGFRL303, FGFRL304, FGFRL305, FGFRL306, FGFRL307, FGFRL308, FGFRL309, FGFRL310, FGFRL311, FGFRL312, FGFRL313, FGFRL314, FGFRL315, FGFRL316, FGFRL317, FGFRL318, FGFRL319, FGFRL320, FGFRL321, FGFRL322, FGFRL323, FGFRL324, FGFRL325, FGFRL326, FGFRL327, FGFRL328, FGFRL329, FGFRL330, FGFRL331, FGFRL332, FGFRL333, FGFRL334, FGFRL335, FGFRL336, FGFRL337, FGFRL338, FGFRL339, FGFRL340, FGFRL341, FGFRL342, FGFRL343, FGFRL344, FGFRL345, FGFRL346, FGFRL347, FGFRL348, FGFRL349, FGFRL350, FGFRL351, FGFRL352, FGFRL353, FGFRL354, FGFRL355, FGFRL356, FGFRL357, FGFRL358, FGFRL359, FGFRL360, FGFRL361, FGFRL362, FGFRL363, FGFRL364, FGFRL365, FGFRL366, FGFRL367, FGFRL368, FGFRL369, FGFRL370, FGFRL371, FGFRL372, FGFRL373, FGFRL374, FGFRL375, FGFRL376, FGFRL377, FGFRL378, FGFRL379, FGFRL380, FGFRL381, FGFRL382, FGFRL383, FGFRL384, FGFRL385, FGFRL386, FGFRL387, FGFRL388, FGFRL389, FGFRL390, FGFRL391, FGFRL392, FGFRL393, FGFRL394, FGFRL395, FGFRL396, FGFRL397, FGFRL398, FGFRL399, FGFRL400, FGFRL401, FGFRL402, FGFRL403, FGFRL404, FGFRL405, FGFRL406, FGFRL407, FGFRL408, FGFRL409, FGFRL410, FGFRL411, FGFRL412, FGFRL413, FGFRL414, FGFRL415, FGFRL416, FGFRL417, FGFRL418, FGFRL419, FGFRL420, FGFRL421, FGFRL422, FGFRL423, FGFRL424, FGFRL425, FGFRL426, FGFRL427, FGFRL428, FGFRL429, FGFRL430, FGFRL431, FGFRL432, FGFRL433, FGFRL434, FGFRL435, FGFRL436, FGFRL437, FGFRL438, FGFRL439, FGFRL440, FGFRL441, FGFRL442, FGFRL443, FGFRL444, FGFRL445, FGFRL446, FGFRL447, FGFRL448, FGFRL449, FGFRL450, FGFRL451, FGFRL452, FGFRL453, FGFRL454, FGFRL455, FGFRL456, FGFRL457, FGFRL458, FGFRL459, FGFRL460, FGFRL461, FGFRL462, FGFRL463, FGFRL464, FGFRL465, FGFRL466, FGFRL467, FGFRL468, FGFRL469, FGFRL470, FGFRL471, FGFRL472, FGFRL473, FGFRL474, FGFRL475, FGFRL476, FGFRL477, FGFRL478, FGFRL479, FGFRL480, FGFRL481, FGFRL482, FGFRL483, FGFRL484, FGFRL485, FGFRL486, FGFRL487, FGFRL488, FGFRL489, FGFRL490, FGFRL491, FGFRL492, FGFRL493, FGFRL494, FGFRL495, FGFRL496, FGFRL497, FGFRL498, FGFRL499, FGFRL500, FGFRL501, FGFRL502, FGFRL503, FGFRL504, FGFRL505, FGFRL506, FGFRL507, FGFRL508, FGFRL509, FGFRL510, FGFRL511, FGFRL512, FGFRL513, FGFRL514, FGFRL515, FGFRL516, FGFRL517, FGFRL518, FGFRL519, FGFRL520, FGFRL521, FGFRL522, FGFRL523, FGFRL524, FGFRL525, FGFRL526, FGFRL527, FGFRL528, FGFRL529, FGFRL530, FGFRL531, FGFRL532, FGFRL533, FGFRL534, FGFRL535, FGFRL536, FGFRL537, FGFRL538, FGFRL539, FGFRL540, FGFRL541, FGFRL542, FGFRL543, FGFRL544, FGFRL545, FGFRL546, FGFRL547, FGFRL548, FGFRL549, FGFRL550, FGFRL551, FGFRL552, FGFRL553, FGFRL554, FGFRL555, FGFRL556, FGFRL557, FGFRL558, FGFRL559, FGFRL560, FGFRL561, FGFRL562, FGFRL563, FGFRL564, FGFRL565, FGFRL566, FGFRL567, FGFRL568, FGFRL569, FGFRL570, FGFRL571, FGFRL572, FGFRL573, FGFRL574, FGFRL575, FGFRL576, FGFRL577, FGFRL578, FGFRL579, FGFRL580, FGFRL581, FGFRL582, FGFRL583, FGFRL584, FGFRL585, FGFRL586, FGFRL587, FGFRL588, FGFRL589, FGFRL590, FGFRL591, FGFRL592, FGFRL593, FGFRL594, FGFRL595, FGFRL596, FGFRL597, FGFRL598, FGFRL599, FGFRL600, FGFRL601, FGFRL602, FGFRL603, FGFRL604, FGFRL605, FGFRL606, FGFRL607, FGFRL608, FGFRL609, FGFRL610, FGFRL611, FGFRL612, FGFRL613, FGFRL614, FGFRL615, FGFRL616, FGFRL617, FGFRL618, FGFRL619, FGFRL620, FGFRL621, FGFRL622, FGFRL623, FGFRL624, FGFRL625, FGFRL626, FGFRL627, FGFRL628, FGFRL629, FGFRL630, FGFRL631, FGFRL632, FGFRL633, FGFRL634, FGFRL635, FGFRL636, FGFRL637, FGFRL638, FGFRL639, FGFRL640, FGFRL641, FGFRL642, FGFRL643, FGFRL644, FGFRL645, FGFRL646, FGFRL647, FGFRL648, FGFRL649, FGFRL650, FGFRL651, FGFRL652, FGFRL653, FGFRL654, FGFRL655, FGFRL656, FGFRL657, FGFRL658, FGFRL659, FGFRL660, FGFRL661, FGFRL662, FGFRL663, FGFRL664, FGFRL665, FGFRL666, FGFRL667, FGFRL668, FGFRL669, FGFRL670, FGFRL671, FGFRL672, FGFRL673, FGFRL674, FGFRL675, FGFRL676, FGFRL677, FGFRL678, FGFRL679, FGFRL680, FGFRL681, FGFRL682, FGFRL683, FGFRL684, FGFRL685, FGFRL686, FGFRL687, FGFRL688, FGFRL689, FGFRL690, FGFRL691, FGFRL692, FGFRL693, FGFRL694, FGFRL695, FGFRL696, FGFRL697, FGFRL698, FGFRL699, FGFRL700, FGFRL701, FGFRL702, FGFRL703, FGFRL704, FGFRL705, FGFRL706, FGFRL707, FGFRL708, FGFRL709, FGFRL710, FGFRL711, FGFRL712, FGFRL713, FGFRL714, FGFRL715, FGFRL716, FGFRL717, FGFRL718, FGFRL719, FGFRL720, FGFRL721, FGFRL722, FGFRL723, FGFRL724, FGFRL725, FGFRL726, FGFRL727, FGFRL728, FGFRL729, FGFRL730, FGFRL731, FGFRL732, FGFRL733, FGFRL734, FGFRL735, FGFRL736, FGFRL737, FGFRL738, FGFRL739, FGFRL740, FGFRL741, FGFRL742, FGFRL743, FGFRL744, FGFRL745, FGFRL746, FGFRL747, FGFRL748, FGFRL749, FGFRL750, FGFRL751, FGFRL752, FGFRL753, FGFRL754, FGFRL755, FGFRL756, FGFRL757, FGFRL758, FGFRL759, FGFRL760, FGFRL761, FGFRL762, FGFRL763, FGFRL764, FGFRL765, FGFRL766, FGFRL767, FGFRL768, FGFRL769, FGFRL770, FGFRL771, FGFRL772, FGFRL773, FGFRL774, FGFRL775, FGFRL776, FGFRL777, FGFRL778, FGFRL779, FGFRL780, FGFRL781, FGFRL782, FGFRL783, FGFRL784, FGFRL785, FGFRL786, FGFRL787, FGFRL788, FGFRL789, FGFRL790, FGFRL791, FGFRL792, FGFRL793, FGFRL794, FGFRL795, FGFRL796, FGFRL797, FGFRL798, FGFRL799, FGFRL800, FGFRL801, FGFRL802, FGFRL803, FGFRL804, FGFRL805, FGFRL806, FGFRL807, FGFRL808, FGFRL809, FGFRL810, FGFRL811, FGFRL812, FGFRL813, FGFRL814, FGFRL815, FGFRL816, FGFRL817, FGFRL818, FGFRL819, FGFRL820, FGFRL821, FGFRL822, FGFRL823, FGFRL824, FGFRL825, FGFRL826, FGFRL827, FGFRL828, FGFRL829, FGFRL830, FGFRL831, FGFRL832, FGFRL833, FGFRL834, FGFRL835, FGFRL836, FGFRL837, FGFRL838, FGFRL839, FGFRL840, FGFRL841, FGFRL842, FGFRL843, FGFRL844, FGFRL845, FGFRL846, FGFRL847, FGFRL848, FGFRL849, FGFRL850, FGFRL851, FGFRL852, FGFRL853, FGFRL854, FGFRL855, FGFRL856, FGFRL857, FGFRL858, FGFRL859, FGFRL860, FGFRL861, FGFRL862, FGFRL863, FGFRL864, FGFRL865, FGFRL866, FGFRL867, FGFRL868, FGFRL869, FGFRL870, FGFRL871, FGFRL872, FGFRL873, FGFRL874, FGFRL875, FGFRL876, FGFRL877, FGFRL878, FGFRL879, FGFRL880, FGFRL881, FGFRL882, FGFRL883, FGFRL884, FGFRL885, FGFRL886, FGFRL887, FGFRL888, FGFRL889, FGFRL890, FGFRL891, FGFRL892, FGFRL893, FGFRL894, FGFRL895, FGFRL896, FGFRL897, FGFRL898, FGFRL899, FGFRL900, FGFRL901, FGFRL902, FGFRL903, FGFRL904, FGFRL905, FGFRL906, FGFRL907, FGFRL908, FGFRL909, FGFRL910, FGFRL911, FGFRL912, FGFRL913, FGFRL914, FGFRL915, FGFRL916, FGFRL917, FGFRL918, FGFRL919, FGFRL920, FGFRL921, FGFRL922, FGFRL923, FGFRL924, FGFRL925, FGFRL926, FGFRL927, FGFRL928, FGFRL929, FGFRL930, FGFRL931, FGFRL932, FGFRL933, FGFRL934, FGFRL935, FGFRL936, FGFRL937, FGFRL938, FGFRL939, FGFRL940, FGFRL941, FGFRL942, FGFRL943, FGFRL944, FGFRL945, FGFRL946, FGFRL947, FGFRL948, FGFRL949, FGFRL950, FGFRL951, FGFRL952, FGFRL953, FGFRL954, FGFRL955, FGFRL956, FGFRL957, FGFRL958, FGFRL959, FGFRL960, FGFRL961, FGFRL962, FGFRL963, FGFRL964, FGFRL965, FGFRL966, FGFRL967, FGFRL968, FGFRL969, FGFRL970, FGFRL971, FGFRL972, FGFRL973, FGFRL974, FGFRL975, FGFRL976, FGFRL977, FGFRL978, FGFRL979, FGFRL980, FGFRL981, FGFRL982, FGFRL983, FGFRL984, FGFRL985, FGFRL986, FGFRL987, FGFRL988, FGFRL989, FGFRL990, FGFRL991, FGFRL992, FGFRL993, FGFRL994, FGFRL995, FGFRL996, FGFRL997, FGFRL998, FGFRL999, FGFRL1000, FGFRL1001, FGFRL1002, FGFRL1003, FGFRL1004, FGFRL1005, FGFRL1006, FGFRL1007, FGFRL1008, FGFRL1009, FGFRL1010, FGFRL1011, FGFRL1012, FGFRL1013, FGFRL1014, FGFRL1015, FGFRL1016, FGFRL1017, FGFRL1018, FGFRL1019, FGFRL1020, FGFRL1021, FGFRL1022, FGFRL1023, FGFRL1024, FGFRL1025, FGFRL1026, FGFRL1027, FGFRL1028, FGFRL1029, FGFRL1030, FGFRL1031, FGFRL1032, FGFRL1033, FGFRL1034, FGFRL1035, FGFRL1036, FGFRL1037, FGFRL1038, FGFRL1039, FGFRL1040, FGFRL1041, FGFRL1042, FGFRL1043, FGFRL1044, FGFRL1045, FGFRL1046, FGFRL1047, FGFRL1048, FGFRL1049, FGFRL1050, FGFRL1051, FGFRL1052, FGFRL1053, FGFRL1054, FGFRL1055, FGFRL1056, FGFRL1057, FGFRL1058, FGFRL1059, FGFRL1060, FGFRL1061, FGFRL1062, FGFRL1063, FGFRL1064, FGFRL1065, FGFRL1066, FGFRL1067, FGFRL1068, FGFRL1069, FGFRL1070, FGFRL1071, FGFRL1072, FGFRL1073, FGFRL1074, FGFRL1075, FGFRL1076, FGFRL1077, FGFRL1078, FGFRL1079, FGFRL1080, FGFRL1081, FGFRL1082, FGFRL1083, FGFRL1084, FGFRL1085, FGFRL1086, FGFRL1087, FGFRL1088, FGFRL1089, FGFRL1090, FGFRL1091, FGFRL1092, FGFRL1093, FGFRL1094, FGFRL1095, FGFRL1096, FGFRL1097, FGFRL1098, FGFRL1099, FGFRL1100, FGFRL1101, FGFRL1102, FGFRL1103, FGFRL1104, FGFRL1105, FGFRL1106, FGFRL1107, FGFRL1108, FGFRL1109, FGFRL1110, FGFRL1111, FGFRL1112, FGFRL1113, FGFRL1114, FGFRL1115, FGFRL1116, FGFRL1117, FGFRL1118, FGFRL1119, FGFRL1120, FGFRL1121, FGFRL1122, FGFRL1123, FGFRL1124, FGFRL1125, FGFRL1126, FGFRL1127, FGFRL1128, FGFRL1129, FGFRL1130, FGFRL1131, FGFRL1132, FGFRL1133, FGFRL1134, FGFRL1135, FGFRL1136, FGFRL1137, FGFRL1138, FGFRL1139, FGFRL1140, FGFRL1141, FGFRL1142, FGFRL1143, FGFRL1144, FGFRL1145, FGFRL1146, FGFRL1147, FGFRL1148, FGFRL1149, FGFRL1150, FGFRL1151, FGFRL1152, FGFRL1153, FGFRL1154, FGFRL1155, FGFRL1156, FGFRL1157, FGFRL1158, FGFRL1159, FGFRL1160, FGFRL1161, FGFRL1162, FGFRL1163, FGFRL1164, FGFRL1165, FGFRL1166, FGFRL1167, FGFRL1168, FGFRL1169, FGFRL1170, FGFRL1171, FGFRL1172, FGFRL1173, FGFRL1174, FGFRL1175, FGFRL1176, FGFRL1177, FGFRL1178, FGFRL1179, FGFRL1180, FGFRL1181, FGFRL1182, FGFRL1183, FGFRL1184, FGFRL1185, FGFRL1186, FGFRL1187, FGFRL1188, FGFRL1189, FGFRL1190, FGFRL1191, FGFRL1192, FGFRL1193, FGFRL1194, FGFRL1195, FGFRL1196, FGFRL1197, FGFRL1198, FGFRL1199, FGFRL1200, FGFRL1201, FGFRL1202, FGFRL1203, FGFRL1204, FGFRL1205, FGFRL1206, FGFRL1207, FGFRL1208, FGFRL1209, FGFRL1210, FGFRL1211, FGFRL1212, FGFRL1213, FGFRL1214, FGFRL1215, FGFRL1216, FGFRL1217, FGFRL1218, FGFRL1219, FGFRL1220, FGFRL1221, FGFRL1222, FGFRL1223, FGFRL1224, FGFRL1225, FGFRL1226, FGFRL1227, FGFRL1228, FGFRL1229, FGFRL1230, FGFRL1231, FGFRL1232, FGFRL1233, FGFRL1234, FGFRL1235, FGFRL1236, FGFRL1237, FGFRL1238, FGFRL1239, FGFRL1240, FGFRL1241, FGFRL1242, FGFRL1243, FGFRL1244, FGFRL1245, FGFRL1246, FGFRL1247, FGFRL1248, FGFRL1249, FGFRL1250, FGFRL1251, FGFRL1252, FGFRL1253, FGFRL1254, FGFRL1255, FGFRL1256, FGFRL1257, FGFRL1258, FGFRL1259, FGFRL1260, FGFRL1261, FGFRL1262, FGFRL1263, FGFRL1264, FGFRL1265, FGFRL1266, FGFRL1267, FGFRL1268, FGFRL1269, FGFRL1270, FGFRL1271, FGFRL1272, FGFRL1273, FGFRL1274, FGFRL1275, FGFRL1276, FGFRL1277, FGFRL1278, FGFRL1279, FGFRL1280, FGFRL1281, FGFRL1282, FGFRL1283, FGFRL1284, FGFRL1285, FGFRL1286, FGFRL1287, FGFRL1288, FGFRL1289, FGFRL1290, FGFRL1291, FGFRL1292, FGFRL1293, FGFRL1294, FGFRL1295, FGFRL1296, FGFRL1297, FGFRL1298, FGFRL1299, FGFRL1300, FGFRL1301, FGFRL1302, FGFRL1303, FGFRL1304, FGFRL1305, FGFRL1306, FGFRL1307, FGFRL1308, FGFRL1309, FGFRL1310, FGFRL1311, FGFRL1312, FGFRL1313, FGFRL1314, FGFRL1315, FGFRL1316, FGFRL1317, FGFRL1318, FGFRL1319, FGFRL1320, FGFRL1321, FGFRL1322, FGFRL1323, FGFRL1324, FGFRL1325, FGFRL1326, FGFRL1327, FGFRL1328, FGFRL1329, FGFRL1330, FGFRL1331, FGFRL1332, FGFRL1333, FGFRL1334, FGFRL1335, FGFRL1336, FGFRL1337, FGFRL1338, FGFRL1339, FGFRL1340, FGFRL1341, FGFRL1342, FGFRL1343, FGFRL1344, FGFRL1345, FGFRL1346, FGFRL1347, FGFRL1348, FGFRL1349, FGFRL1350, FGFRL1351, FGFRL1352, FGFRL1353, FGFRL1354, FGFRL1355, FGFRL1356, FGFRL1357, FGFRL1358, FGFRL1359, FGFRL1360, FGFRL1361, FGFRL1362, FGFRL1363, FGFRL1364, FGFRL1365, FGFRL1366, FGFRL1367, FGFRL1368, FGFRL1369, FGFRL1370, FGFRL1371, FGFRL1372, FGFRL1373, FGFRL1374, FGFRL1375, FGFRL1376, FGFRL1377, FGFRL1378, FGFRL1379, FGFRL1380, FGFRL1381, FGFRL1382, FGFRL1383, FGFRL1384, FGFRL1385, FGFRL1386, FGFRL1387, FGFRL1388, FGFRL1389, FGFRL1390, FGFRL1391, FGFRL1392, FGFRL1393, FGFRL1394, FGFRL1395, FGFRL1396, FGFRL1397, FGFRL1398, FGFRL1399, FGFRL1400, FGFRL1401, FGFRL1402, FGFRL1403, FGFRL1404, FGFRL1405, FGFRL1406, FGFRL1407, FGFRL1408, FGFRL1409, FGFRL1410, FGFRL1411, FGFRL1412, FGFRL1413, FGFRL1414, FGFRL1415, FGFRL1416, FGFRL1417, FGFRL1418, FGFRL1419, FGFRL1420, FGFRL1421, FGFRL1422, FGFRL1423, FGFRL1424, FGFRL1425, FGFRL1426, FGFRL1427, FGFRL1428, FGFRL1429, FGFRL1430, FGFRL1431, FGFRL1432, FGFRL1433, FGFRL1434, FGFRL1435, FGFRL1436, FGFRL1437, FGFRL1438, FGFRL1439, FGFRL1440, FGFRL1441, FGFRL1442, FGFRL1443, FGFRL1444, FGFRL1445, FGFRL1446, FGFRL1447, FGFRL1448, FGFRL1449, FGFRL1450, FGFRL1451, FGFRL1452, FGFRL1453, FGFRL1454, FGFRL1455, FGFRL1456, FGFRL1457, FGFRL1458, FGFRL1459, FGFRL1460, FGFRL1461, FGFRL1462, FGFRL1463, FGFRL1464, FGFRL1465, FGFRL1466, FGFRL1467, FGFRL1468, FGFRL1469, FGFRL1470, FGFRL1471, FGFRL1472, FGFRL1473, FGFRL1474, FGFRL1475, FGFRL1476, FGFRL1477, FGFRL1478, FGFRL1479, FGFRL1480, FGFRL1481, FGFRL1482, FGFRL1483, FGFRL1484, FGFRL1485, FGFRL1486, FGFRL1487, FGFRL1488, FGFRL1489, FGFRL1490, FGFRL1491, FGFRL1492, FGFRL1493, FGFRL1494, FGFRL1495, FGFRL1496, FGFRL1497, FGFRL1498, FGFRL1499, FGFRL1500, FGFRL1501, FGFRL1502, FGFRL1503, FGFRL1504, FGFRL1505, FGFRL1506, FGFRL1507, FGFRL1508, FGFRL |

**Table S2, Supplementary Materials.** Detailed genetic testing results on all identified pathogenic variants (P), likely pathogenic variants (LP) or variants of uncertain significance (VUS) by OtoSCOPE® v.9. Variant interpretation reflects Molecular Otolaryngology and Renal Research Laboratories (MORL) expert opinion and considers all extracted data from the Deafness Variation Database (DVD, <http://deafnessvariationdatabase.org/>). Benign or likely benign variants are not presented in the table.

| ID | Variants found in genes with probable genetic cause for hearing loss; gene, transcript: variant, zygosity, gnomAD population (interpretation)                    | All other pathogenic (P), likely pathogenic (LP) or uncertain significance variants (VUS) considered; gene, transcript: variant, zygosity, gnomAD population (interpretation)                                                                                                                                                                                                                                                                                                                                                                                                                                                                                                                                                                                                    |
|----|------------------------------------------------------------------------------------------------------------------------------------------------------------------|----------------------------------------------------------------------------------------------------------------------------------------------------------------------------------------------------------------------------------------------------------------------------------------------------------------------------------------------------------------------------------------------------------------------------------------------------------------------------------------------------------------------------------------------------------------------------------------------------------------------------------------------------------------------------------------------------------------------------------------------------------------------------------|
| 1  | --                                                                                                                                                               | --                                                                                                                                                                                                                                                                                                                                                                                                                                                                                                                                                                                                                                                                                                                                                                               |
| 2  | <p><b>GJB2</b>, NM_004004.6:c.35 del, p.(Gly12ValfsTer2), het (52%), NFE (P);</p> <p><b>GJB2</b>, NM_004004.6:c.101 T&gt;C, p.(Met34Thr), het (45%), FIN (P)</p> | <p><b>CDH23</b>, NM_022124.6:c.7722C&gt;T, p.(Tyr2574=), het (47%), NFE (VUS);</p> <p><b>MYO7A</b>, NM_000260.4:c.4845C&gt;A, p.(Pro1615=), het (48%), FIN (VUS).</p>                                                                                                                                                                                                                                                                                                                                                                                                                                                                                                                                                                                                            |
| 3  | <p><b>SALL1</b>, NM_002968.3:c.613 dup, p.(Val205Glyfs*65), het, (LP)*</p>                                                                                       | --                                                                                                                                                                                                                                                                                                                                                                                                                                                                                                                                                                                                                                                                                                                                                                               |
| 4  | --                                                                                                                                                               | --                                                                                                                                                                                                                                                                                                                                                                                                                                                                                                                                                                                                                                                                                                                                                                               |
| 5  | 0                                                                                                                                                                | <p><b>RAI1</b>, NM_030665.4:c.1538A&gt;G, p.(Gln513Arg), het (48%), FIN (VUS);</p> <p><b>SIX2</b>, NM_016932.5:c.759C&gt;T, p.(Ser253=), het (50%), EAS (VUS),</p> <p><b>SLC44A4</b>, NM_025257.3:c.1926+5G&gt;T, het (45%), FIN (VUS);</p> <p><b>TCOF1</b>, NM_001135243.1:c.1635A&gt;C, p.(Ser545=), het (52%), NFE (VUS)</p>                                                                                                                                                                                                                                                                                                                                                                                                                                                  |
| 6  | 0                                                                                                                                                                | <p><b>CABP2</b>, NM_001318496.2:c.363C&gt;A, p.(Thr121=), het (45%), SAS (VUS)</p> <p><b>CACNA1D</b>, NM_000720.4:c.971G&gt;A, p.(Arg324His), het (48%), NFE (VUS)</p> <p><b>COL4A3</b>, NM_000091.5:c.2282G&gt;A, p.(Arg761Lys), het (46%), NFE (VUS)</p> <p><b>EDN3</b>, NM_207034.3:c.669C&gt;T, p.(Leu223=), het (52%), AMR (VUS)</p> <p><b>ESPN</b>, NM_031475.3:c.2351C&gt;T, p.(Ala784Val), het (41%), NFE (VUS)</p> <p><b>MYO15A</b>, NM_016239.4:c.9754A&gt;G, p.(Asn3252Asp), het (48%), ASJ (VUS)</p> <p><b>RAI1</b>, NM_030665.4:c.725C&gt;T, p.(Pro242Leu), het (47%), ASJ (VUS)</p> <p><b>TMIE</b>, NM_147196.2:c.393_395del, p.(Lys131 Asp132delinsAsn), het (48%) (VUS)</p> <p><b>TRRAP</b>, NM_001244580.1:c.7686C&gt;T, p.(Asp2562=), het (53%), SAS (VUS)</p> |
| 7  | <p><b>SLC26A4</b>, NM_000441.2:c.122 6G&gt;A:</p>                                                                                                                | --                                                                                                                                                                                                                                                                                                                                                                                                                                                                                                                                                                                                                                                                                                                                                                               |

|    |   |                                                                                                                                                                                                                                                                                                                                                                                                                                                                                                                                                                                                                                                                                                                                                                                                                                                                                                                                                                                                                                                                |    |
|----|---|----------------------------------------------------------------------------------------------------------------------------------------------------------------------------------------------------------------------------------------------------------------------------------------------------------------------------------------------------------------------------------------------------------------------------------------------------------------------------------------------------------------------------------------------------------------------------------------------------------------------------------------------------------------------------------------------------------------------------------------------------------------------------------------------------------------------------------------------------------------------------------------------------------------------------------------------------------------------------------------------------------------------------------------------------------------|----|
|    |   | p.(Arg409His), het,<br>(P); <b>SLC26A4</b> ,<br>NM_000441.2:c.304<br>+2T>C, het, (LP)*                                                                                                                                                                                                                                                                                                                                                                                                                                                                                                                                                                                                                                                                                                                                                                                                                                                                                                                                                                         |    |
| 8  | 0 | <b>ANKH</b> , NM_054027.6:c.1431G>A, p.(Pro477=), het (52%), NFE ( <b>VUS</b> )<br><b>CEACAM16</b> , NM_001039213.4:c.1079G>A, p.(Arg360Gln), het (46%), AFR ( <b>VUS</b> )<br><b>GRXCR1</b> , NM_001080476.2:c.515A>G, p.(Glu172Gly), het (49%), NFE ( <b>VUS</b> )<br><b>LRP2</b> , NM_004525.3:c.1042+8A>G, het (49%), NFE ( <b>VUS</b> )<br><b>MT-ND1</b> , ENST00000361390.2:c.174A>G, p.(Lys58=), hom (100%), ( <b>VUS</b> )<br><b>MYH14</b> , NM_001145809.2:c.2471G>C, p.(Ser824Thr), het (44%), OTH ( <b>VUS</b> )<br><b>MYO7A</b> , NM_000260.4:c.5166C>T, p.(Phe1722=), het (54%), SAS ( <b>VUS</b> )<br><b>PAX1</b> , NM_006192.5:c.287-31T>G, het (45%), EAS ( <b>VUS</b> )<br><b>SLC33A1</b> , NM_004733.4:c.849A>G, p.(Glu283=), het (50%), SAS ( <b>VUS</b> )<br><b>SLC44A4</b> , NM_025257.3:c.117_125del, p.(Leu42 Phe44del), het (42%), FIN ( <b>VUS</b> )<br><b>USH1C</b> , NM_153676.4:c.2441C>A, p.(Thr814Asn), het (54%), NFE ( <b>VUS</b> )                                                                                            |    |
| 9  | 0 | <b>CHD7</b> , NM_017780.4:c.7579A>C, p.(Met2527Leu), het (49%), NFE ( <b>VUS</b> )<br><b>LOXHD1</b> , NM_144612.6:c.6555C>T, p.(Ala2185=), het (50%), OTH ( <b>VUS</b> )<br><b>LRP2</b> , NM_004525.3:c.5296A>C, p.(Lys1766Gln), het (50%), ( <b>VUS</b> )<br><b>MANBA</b> , NM_005908.4:c.1944A>G, p.(Gln648=), het (50%), AFR ( <b>VUS</b> )<br><b>PDE1C</b> , NM_001191057.4:c.1993C>G, p.(Pro665Ala), het (49%), NFE ( <b>VUS</b> )<br><b>TECTA</b> , NM_005422.2:c.6100G>A, p.(Asp2034Asn), het (46%), NFE ( <b>VUS</b> )<br><b>TMC1</b> , NM_138691.2:c.703G>T, p.(Ala235Ser), het (46%), OTH ( <b>VUS</b> )<br><b>TNC</b> , NM_002160.4:c.5012C>G, p.(Pro1671Arg), het (44%), ( <b>VUS</b> )<br><b>TPRN</b> , NM_001128228.3:c.468C>T, p.(Arg156=), het (62%), het (45%), AFR ( <b>VUS</b> )<br><b>TWNK</b> , NM_021830.5:c.77G>T, p.(Gly26Val), het (45%), NFE ( <b>VUS</b> )<br><b>USH1C</b> , NM_153676.4:c.381G>T, p.(Gly127=), het (47%), ASJ ( <b>VUS</b> )<br><b>USH2A</b> , NM_206933.3:c.14664G>A, p.(Thr4888=), het (49%), NFE ( <b>VUS</b> ) |    |
| 10 |   | In chromosom 8<br>deletion: 176,464-<br>7,025,440<br>(Localization:<br>p23.1pter),<br>duplication:<br>12,555,985-<br>43,333,355<br>(Localization:<br>p11:21p23.1)*                                                                                                                                                                                                                                                                                                                                                                                                                                                                                                                                                                                                                                                                                                                                                                                                                                                                                             | -- |
| 11 | 0 | <b>CDH23</b> , NM_022124.6:c.9738+6C>T, het (46%), AMR ( <b>VUS</b> )<br><b>LRP2</b> , NM_004525.3:c.2178G>T, p.(Leu726Phe), het (50%), NFE ( <b>VUS</b> )<br><b>MYO15A</b> , NM_016239.4:c.10393C>T, p.(Arg3465Trp), het (50%), SAS ( <b>VUS</b> )<br><b>OTOGL</b> , NM_173591.3:c.388T>C, p.(Tyr130His), het (50%), OTH ( <b>VUS</b> )<br><b>TBC1D24</b> , NM_020705.3:c.1408G>A, p.(Ala470Thr), het (55%), AFR ( <b>VUS</b> )<br><b>TRRAP</b> , NM_001244580.1:c.8524C>G, p.(Gln2842Glu), het (49%), FIN ( <b>VUS</b> )                                                                                                                                                                                                                                                                                                                                                                                                                                                                                                                                     |    |
| 12 | 0 | <b>ADGRV1</b> , NM_032119.4:c.10974+4A>G, het (50%), SAS ( <b>VUS</b> )<br><b>ADGRV1</b> , NM_032119.4:c.409A>G, p.(Ile137Val), het (52%), SAS ( <b>VUS</b> )<br><b>COL4A5</b> , NM_033380.3:c.4515C>T, p.(His1505=), het (47%), SAS ( <b>VUS</b> )<br><b>EPS8L2</b> , NM_022772.4:c.896-4C>G, het (56%), SAS ( <b>VUS</b> )<br><b>GREB1L</b> , NM_001142966.2:c.3323A>G, p.(Asp1108Gly), het (48%), FIN ( <b>VUS</b> )<br><b>GREB1L</b> , NM_001142966.2:c.172G>A, p.(Val58Met), het (48%), SAS ( <b>VUS</b> )<br><b>MT-CO1</b> , ENST00000361624.2:c.48A>T, p.(Gly16=), hom (100%), ( <b>VUS</b> )                                                                                                                                                                                                                                                                                                                                                                                                                                                           |    |

|    |   |                                                                      |
|----|---|----------------------------------------------------------------------|
|    |   | MT-ND1, ENST00000361390.2:c.615C>T, p.(Ser205=), hom (100%), (VUS)   |
|    |   | OTOF, NM_001287489.2:c.5027G>T, p.(Arg1676Leu), het (45%), NFE (VUS) |
|    |   | PNPT1, NM_033109.5:c.232A>G, p.(Thr78Ala), het (44%), SAS (VUS)      |
|    |   | POLR1C, NM_203290.4:c.503-7C>T, het (49%), SAS (VUS)                 |
|    |   | TBX1, NM_080647.1:c.1325G>C, p.(Arg442Pro), het (49%), SAS (VUS)     |
|    |   | COL11A2, NM_080680.3:c.353G>C, p.(Arg118Pro), het (45%), NFE (VUS)   |
|    |   | ERAL1, NM_005702.4:c.542A>G, p.(His181Arg), het (45%), AFR (VUS)     |
|    |   | ILDR1, NM_001199799.2:c.116C>T, p.(Ala39Val), het (45%), (VUS)       |
|    |   | KITLG, NM_000899.5:c.251T>C, p.(Leu84Pro), het (45%), (VUS)          |
| 13 | 0 | OTOG, NM_001277269.2:c.4058G>A, p.(Arg1353Gln), het (45%), OTH (VUS) |
|    |   | SLC19A2, NM_006996.3:c.824G>T, p.(Arg275Leu), het (45%), AFR (VUS)   |
|    |   | SLC26A5, NM_198999.3:c.1217C>A, p.(Thr406Asn), het (45%), FIN (VUS)  |
|    |   | SPNS2, NM_001124758.3:c.946G>A, p.(Val316Ile), het (45%), AFR (VUS)  |
|    |   | STRC, STRC-to-STRCP1 conversion, het ( ), (P)                        |
|    |   | ATP2B2, NM_001001331.4:c.3036C>T, p.(Asn1012=), het (49%), AMR (VUS) |
|    |   | CDH23, NM_022124.6:c.8644T>C, p.(Phe2882Leu), het (48%), NFE (VUS)   |
| 14 | 0 | LRP2, NM_004525.3:c.2210C>T, p.(Ser737Leu), het (49%), OTH (VUS)     |
|    |   | OTOF, NM_001287489.2:c.1732G>C, p.(Val578Leu), het (48%), FIN (VUS)  |
|    |   | TNC, NM_002160.4:c.2547C>G, p.(Ile849Met), het (46%), FIN (VUS)      |
|    |   | CABP2, NM_001318496.2:c.363C>A, p.(Thr121=), het (55%), SAS (VUS)    |
|    |   | COL9A2, NM_001852.4:c.1399C>G, p.(Gln467Glu), het (67%), (VUS)       |
|    |   | LOXHD1, NM_144612.6:c.6057T>C, p.(Cys2019=), het (47%), SAS (VUS)    |
|    |   | MAN2B1, NM_000528.4:c.1419+8G>A, het (52%), (VUS)                    |
|    |   | PEX1, NM_000466.3:c.2442C>T, p.(Phe814=), het (47%), ASJ (VUS)       |
| 15 | 0 | PNPT1, NM_033109.5:c.493C>T, p.(Pro165Ser), het (50%), OTH (VUS)     |
|    |   | RDX, NM_001260492.1:c.19G>A, p.(Val7Ile), het (46%), EAS (VUS)       |
|    |   | TRIOBP, NM_001039141.3:c.3867C>T, p.(Pro1289=), het (49%), OTH (VUS) |
|    |   | TSPEAR, NM_001272037.2:c.1614C>T, p.(Phe538=), het (49%), (VUS)      |
|    |   | WBP2, NM_012478.4:c.211A>G, p.(Met71Val), het (47%), (VUS)           |
|    |   | LMX1A, NM_001174069.1:c.379C>T, p.(Arg127Ter), het (56%), (LP)       |
|    |   | COL4A4, NM_000092.5:c.3044G>A, p.(Gly1015Glu), het (43%), NFE (VUS)  |
|    |   | GAB1, NM_207123.3:c.2019A>G, p.(Gln673=), het (48%), SAS (VUS)       |
|    |   | MT-CO1, ENST00000361624.2:c.468C>T, p.(Ser156=), hom (100%), (VUS)   |
| 16 | 0 | MT-CO1, ENST00000361624.2:c.318T>C, p.(Pro106=), hom (99%), (VUS)    |
|    |   | OTOF, NM_001287489.2:c.5029G>A, p.(Ala1677Thr), het (49%), AFR (VUS) |
|    |   | RAI1, NM_030665.4:c.5235T>G, p.(Cys1745Trp), het (48%), SAS (VUS)    |
|    |   | TRIOBP, NM_001039141.3:c.5052G>A, p.(Thr1684=), het (54%), NFE (VUS) |
|    |   | ALMS1, NM_015120.4:c.9715C>T, p.(Arg3239Cys), het (50%), ASJ (VUS)   |
|    |   | EPS8, NM_004447.6:c.1788G>T, p.(Gly596=), het (46%), FIN (VUS)       |
| 17 | 0 | GSDME, NM_004403.3:c.1122C>T, p.(Pro374=), het (48%), NFE (VUS)      |
|    |   | LHFPL5, NM_182548.4:c.592G>A, p.(Val198Met), het (50%), NFE (VUS)    |
|    |   | MYO6, NM_001368136.1:c.1224-4A>G, het (50%), ASJ (VUS)               |
|    |   | ADGRV1, NM_032119.4:c.10149C>T, p.(Ser3383=), het (48%), SAS (VUS)   |
|    |   | ALMS1, NM_015120.4:c.4231G>C, p.(Ala1411Pro), het (48%), OTH (VUS)   |
|    |   | CDH23, NM_022124.6:c.3999G>A, p.(Val1333=), het (54%), FIN (VUS)     |
|    |   | CDH23, NM_022124.6:c.7131C>T, p.(Asn2377=), het (50%), OTH (VUS)     |
| 18 | 0 | FOXI1, NM_012188.5:c.908G>A, p.(Gly303Glu), het (49%), AMR (VUS)     |
|    |   | MT-CO1, ENST00000361624.2:c.1407T>C, p.(Ile469=), hom (100%), (VUS)  |
|    |   | MYO15A, NM_016239.4:c.823G>C, p.(Gly275Arg), het (63%), OTH (VUS)    |
|    |   | OTOG, NM_001277269.2:c.1657T>C, p.(Leu553=), het (49%), AMR (VUS)    |
|    |   | SLC44A4, NM_025257.3:c.1581A>G, p.(Arg527=), het (49%), AFR (VUS)    |

|    |                                                                                |                                                                            |
|----|--------------------------------------------------------------------------------|----------------------------------------------------------------------------|
| 19 | CHD7,<br>NM_017780.4:c.345<br>7C>G,<br>p.(Pro1153Ala), het<br>(48%), NFE (VUS) | TCOF1, NM_001135243.1:c.3336C>T, p.(Pro1112=), het (46%), (VUS)            |
|    |                                                                                | TMC1, NM_138691.2:c.236+1G>A, het (50%), EAS (P)                           |
|    |                                                                                | WHRN, NM_015404.4:c.2354C>T, p.(Thr785Ile), het (50%), SAS (VUS)           |
|    |                                                                                | ATP6V0A4, NM_020632.3:c.2046G>C, p.(Glu682Asp), het (40%), SAS (VUS)       |
|    |                                                                                | CHD7, NM_017780.4:c.2840G>A, p.(Arg947Gln), het (55%), SAS (VUS)           |
|    |                                                                                | CHD7, NM_017780.4:c.3457C>G, p.(Pro1153Ala), het (48%), NFE (VUS)          |
|    |                                                                                | COL9A3, NM_001853.4:c.1668_1721del, p.(Pro558_Gly575del), het (47%), (VUS) |
|    |                                                                                | EYA1, NM_000503.6:c.196G>A, p.(Gly66Ser), het (46%), (VUS)                 |
|    |                                                                                | FGFR1, NM_023110.3:c.937-1208G>A, het (50%), SAS (VUS)                     |
|    |                                                                                | MT-CO1, ENST00000361624.2:c.273T>C, p.(Asp91=), hom (100%), (VUS)          |
|    |                                                                                | PDZD7, NM_001195263.2:c.2180C>A, p.(Pro727His), het (56%), (VUS)           |
|    |                                                                                | POLR1B, NM_019014.6:c.543G>A, p.(Met181Ile), het (52%), SAS (VUS)          |
|    |                                                                                | SLC26A5, NM_198999.3:c.1450T>C, p.(Leu484=), het (52%), SAS (VUS)          |
|    |                                                                                | TBL1X, NM_001139466.1:c.627G>A, p.(Ala209=), hom (100%), SAS (VUS)         |
|    |                                                                                | GPSM2, NM_013296.5:c.1799T>A, p.(Ile600Asn), het (47%), NFE (VUS)          |
|    |                                                                                | LOXHD1, NM_144612.6:c.1570C>T, p.(Arg524Cys), het (49%), ASJ (VUS)         |
|    |                                                                                | LRP2, NM_004525.3:c.12379C>A, p.(Arg4127Ser), het (49%), NFE (VUS)         |
|    |                                                                                | PAX1, NM_006192.5:c.1175C>G, p.(Pro392Arg), het (46%), SAS (VUS)           |

\*Tested outside of Otoscope v.9 panel at Clinical Genetics, the Karolinska University Laboratory. -- = no test; 0 = no anomaly detected. het = heterozygous; gnomAD population = Population categories used by Genome Aggregation Database (gnomAD), LP = likely pathogenic; NFE = Non-Finnish European; P = pathogenic; R = right; SAS = South Asian; VUS = variants found of uncertain significance

## References

1. Azaiez, H.; Booth, K.T.; Ephraim, S.S.; Crone, B.; Black-Ziegelbein, E.A.; Marini, R.J.; Shearer, A.E.; Sloan-Heggen, C.M.; Kolbe, D.; Casavant, T. et al. Genomic Landscape and Mutational Signatures of Deafness-Associated Genes. *Am J Hum Genet* **2018**, *103*, 484-497.
2. Richards, S.; Aziz, N.; Bale, S.; Bick, D.; Das, S.; Gastier-Foster, J.; Grody, W.W.; Hegde, M.; Lyon, E.; Spector, E. et al. Standards and guidelines for the interpretation of sequence variants: a joint consensus recommendation of the American College of Medical Genetics and Genomics and the Association for Molecular Pathology. *Genet Med* **2015**, *17*, 405-24.
3. Miller, D.T.; Adam, M.P.; Aradhya, S.; Biesecker, L.G.; Brothman, A.R.; Carter, N.P.; Church, D.M.; Crolla, J.A.; Eichler, E.E.; Epstein, C.J. et al. Consensus statement: chromosomal microarray is a first-tier clinical diagnostic test for individuals with developmental disabilities or congenital anomalies. *Am J Hum Genet* **2010**, *86*, 749-64.
